# Supplementary material for: Downregulation of type 3 inositol (1,4,5)-trisphosphate receptor decreases breast cancer cell migration through an oscillatory Ca2+ signal
Source: PubMed Central journal article supplement (PMC5641133; doi:10.18632/oncotarget.20327), 2017-08-18
Supplement: oncotarget-08-72324-s001.pdf [file oncotarget-08-72324-s001.pdf]

## Downregulation of type 3 inositol (1,4,5)-trisphosphate receptor decreases breast cancer cell migration through an oscillatory $\text{Ca}^{2+}$ signal

### SUPPLEMENTARY MATERIALS

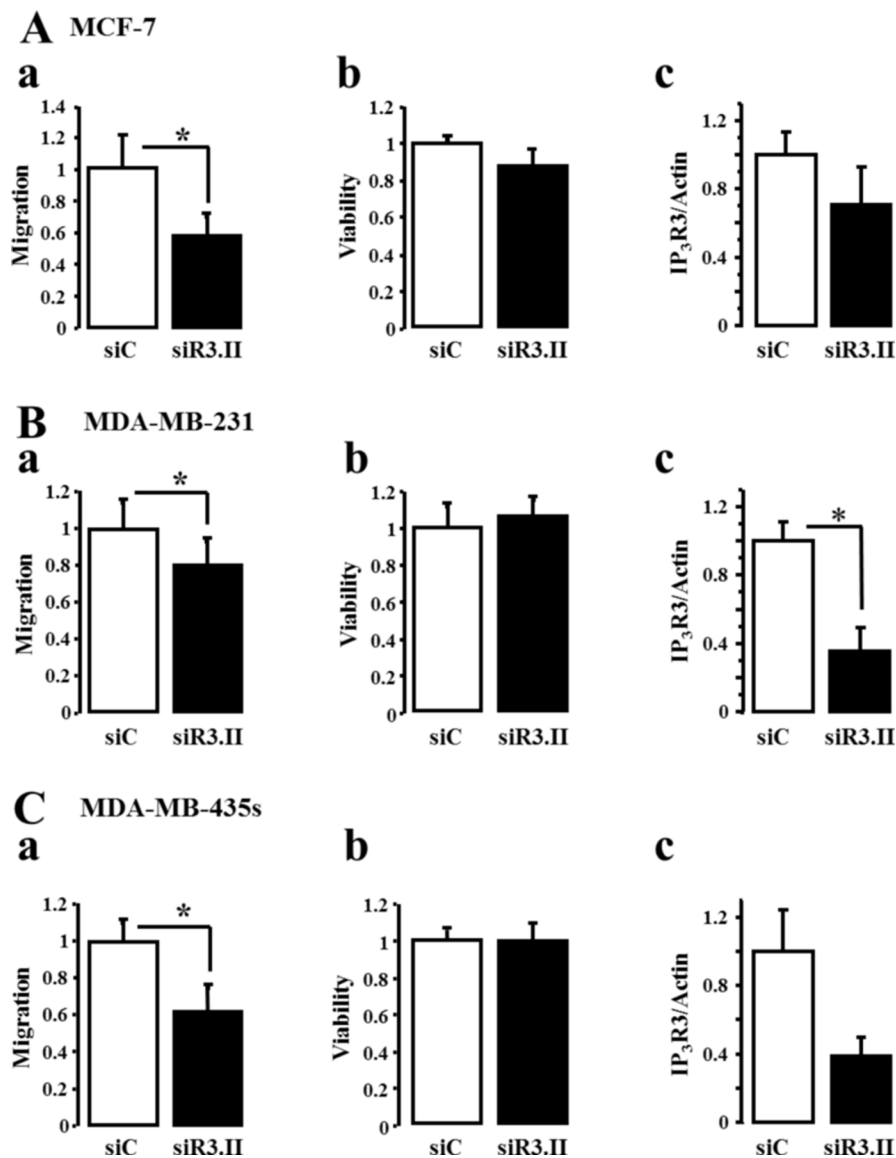

**Supplementary Figure 1: Silencing of IP<sub>3</sub>R3 inhibits breast cancer cell migration independently of siRNA sequence.** The three cell lines were transfected either by a second small interfering RNA (siRNA) directed against IP<sub>3</sub>R3 (siR3.II) or a control siRNA (siC). The migration was then measured using Boyden chamber migration assay at 24 h for MCF-7 and 18 h for MDA-MB-231 and MDA-MB-435s cells, according to their different migration capacities and velocities. In all cases, the measurement was made 72 h after the transfection with respective siRNAs. Silencing of IP<sub>3</sub>R3 (SiR3.II) significantly reduced migration capacity in the three breast cancer cell lines (MCF-7, (Aa) MDA-MB-231, (Ba) and MDA-MB-435s cells, (Ca) compared to control conditions (siC-transfected cells). In all three cell lines, the migration was measured at a time where cell viability was not affected by siR3.II (Ab, Bb and Cb) for MCF-7, MDA-MB-231 and MDA-MB-435s cells, respectively). Silencing efficiency on IP<sub>3</sub>R3 protein expression was confirmed by Western-blot experiments on MCF-7, (Ac) MDA-MB-231, (Bc) and MDA-MB-435s cells, (Cc) Values are reported as mean ± SEM normalized to the corresponding cells transfected with control siRNA (siC) (N = 3). \*p < 0.05.

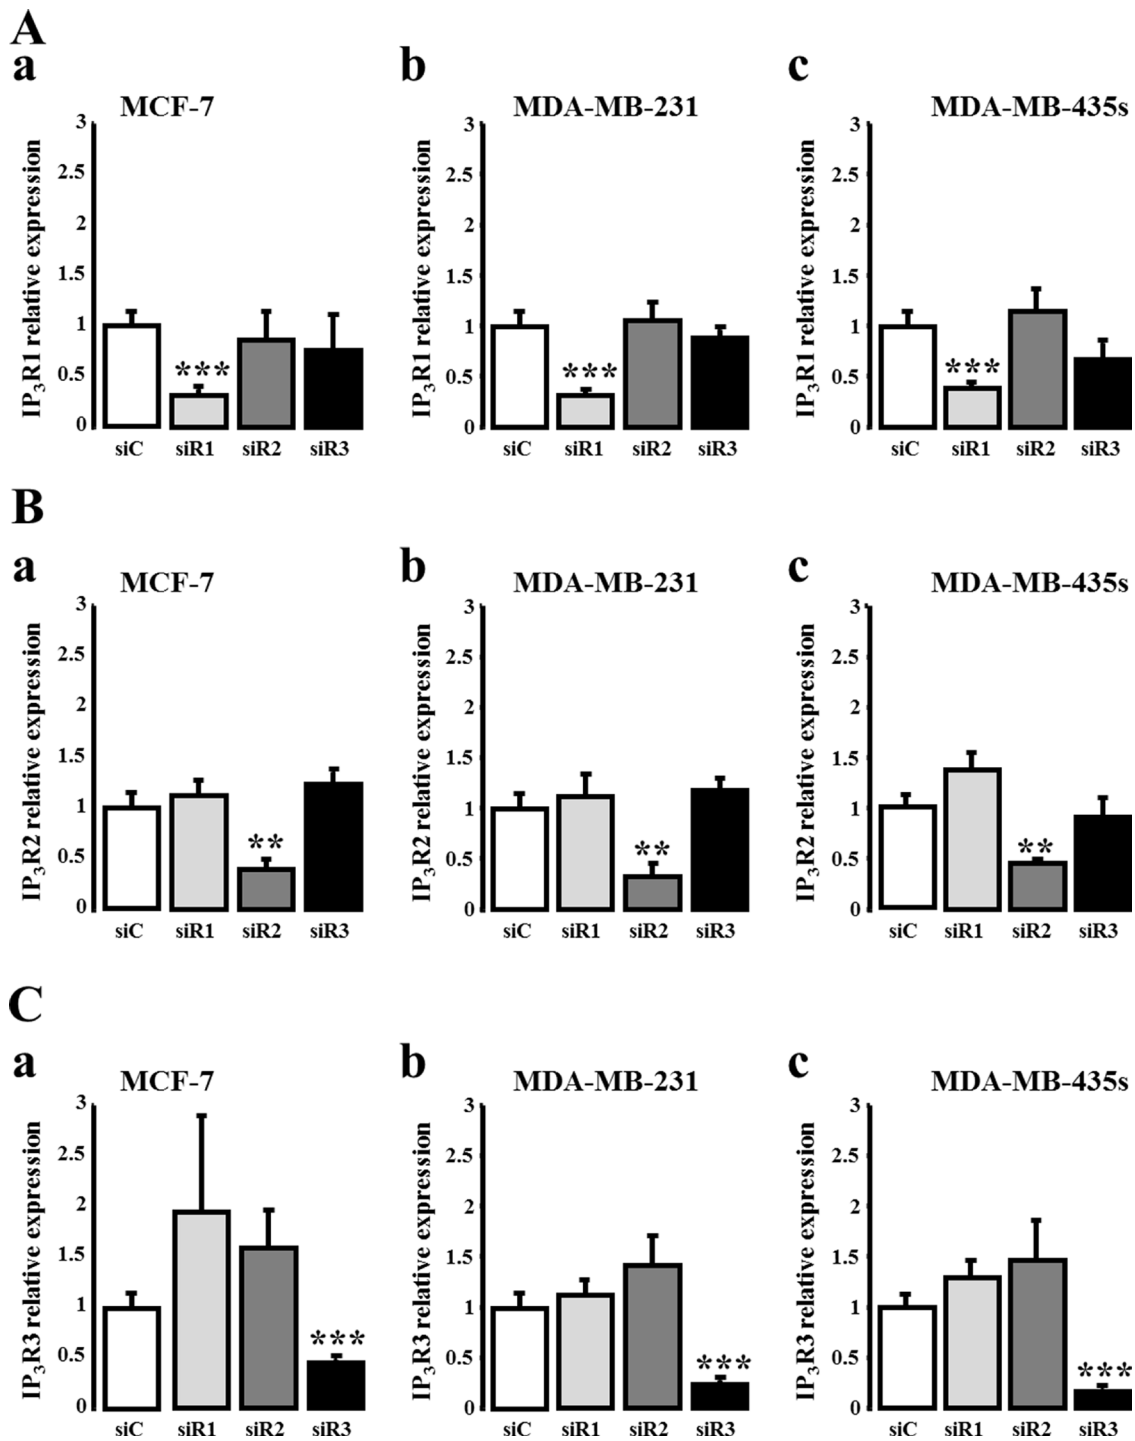

**Supplementary Figure 2: Silencing of IP<sub>3</sub>R1, IP<sub>3</sub>R2 or IP<sub>3</sub>R3 reduces gene expression of IP<sub>3</sub> corresponding receptor in breast cancer cell lines.** The three cell lines were transfected either by a small interfering RNA (siRNA) targeting IP<sub>3</sub>R1 (siR1), IP<sub>3</sub>R2 (siR2), IP<sub>3</sub>R3 (siR3) or a control siRNA (siC). Specific silencing efficiency on IP<sub>3</sub>R1 (A) IP<sub>3</sub>R2 (B) or IP<sub>3</sub>R3 (C) mRNA expression was confirmed by Q-PCR on MCF-7 (a), MDA-MB-231 (b) and MDA-MB-435s (c) cells. Values are reported as mean ± SEM normalized to the corresponding cells transfected with control siRNA (siC) (*N* = 3). \*\*\**p* < 0.001.

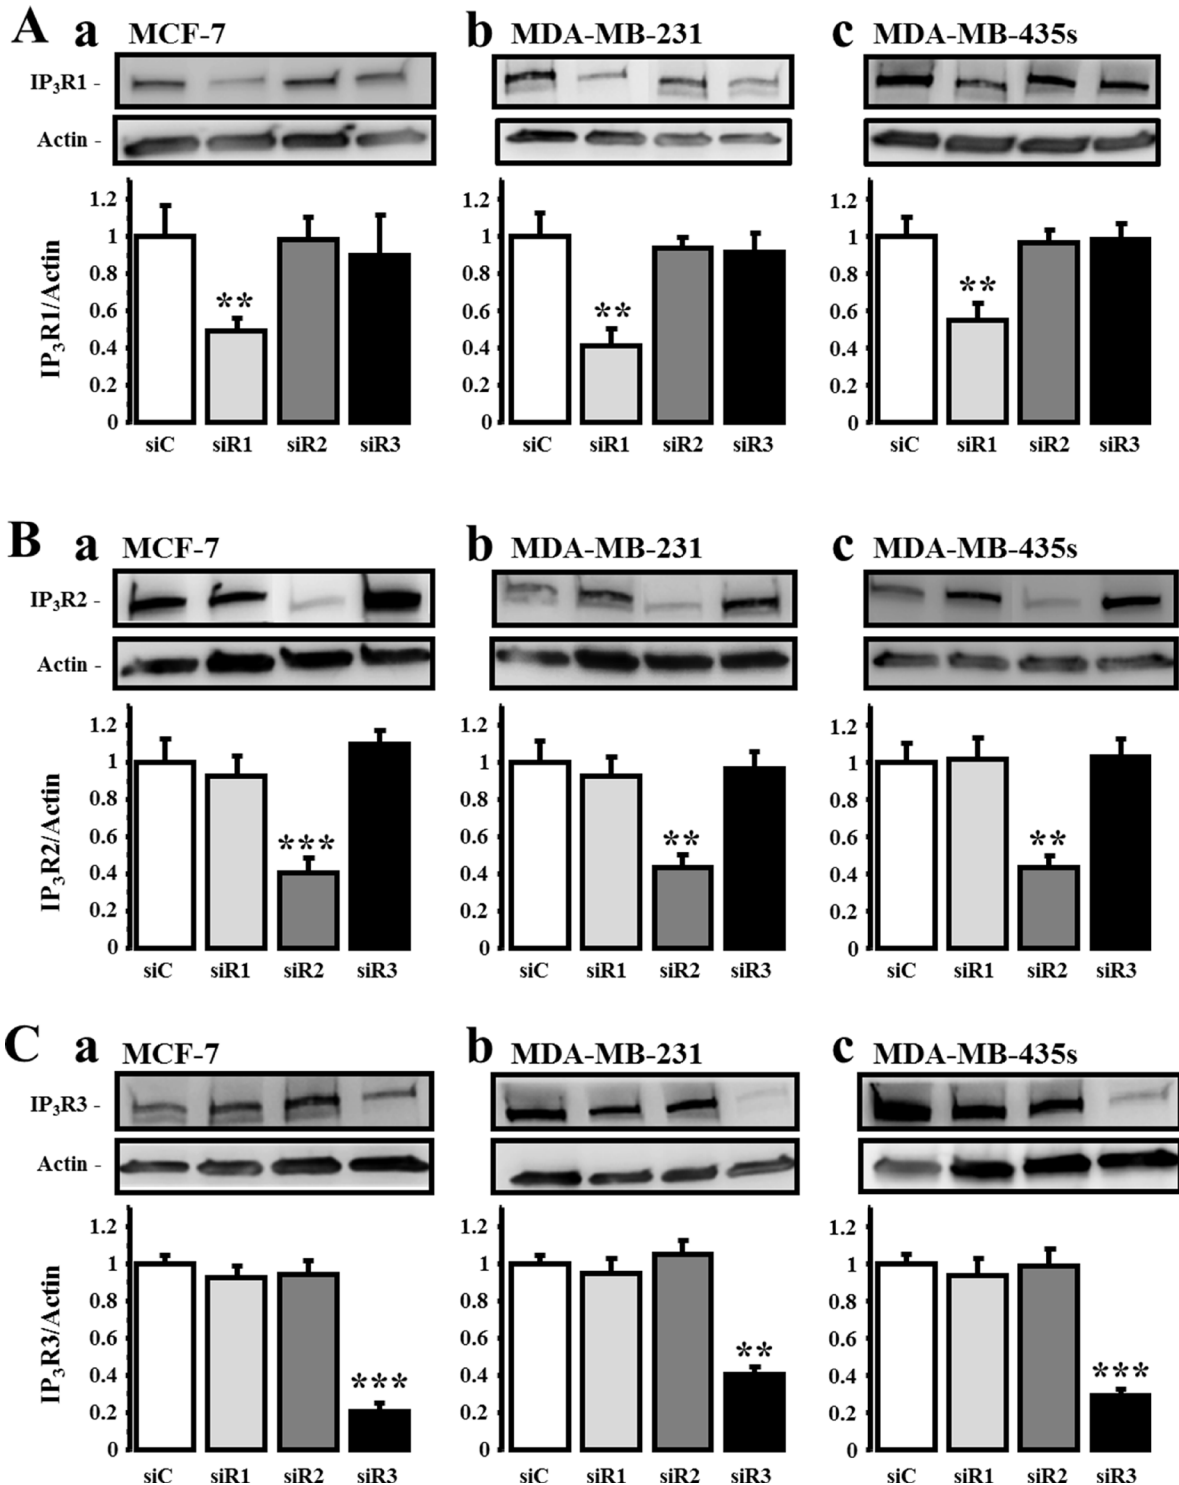

**Supplementary Figure 3: IP<sub>3</sub>R1, IP<sub>3</sub>R2 or IP<sub>3</sub>R3 silencing reduces protein expression of their IP<sub>3</sub> corresponding receptor in breast cancer cell lines.** The three cell lines were transfected either by a small interfering RNA (siRNA) targeting IP<sub>3</sub>R1 (siR1), IP<sub>3</sub>R2 (siR2), IP<sub>3</sub>R3 (siR3) or a control siRNA (siC). The silencing efficiency on IP<sub>3</sub>R1 (A), IP<sub>3</sub>R2 (B) or IP<sub>3</sub>R3 (C) protein expression was confirmed by Western-blot on MCF-7 (a), MDA-MB-231 (b) and MDA-MB-435s (c) cells. Values are reported as mean  $\pm$  SEM normalized to the corresponding cells transfected with control siRNA (siC) ( $N = 3$ ). \*\* $p < 0.01$ , \*\*\* $p < 0.001$ .

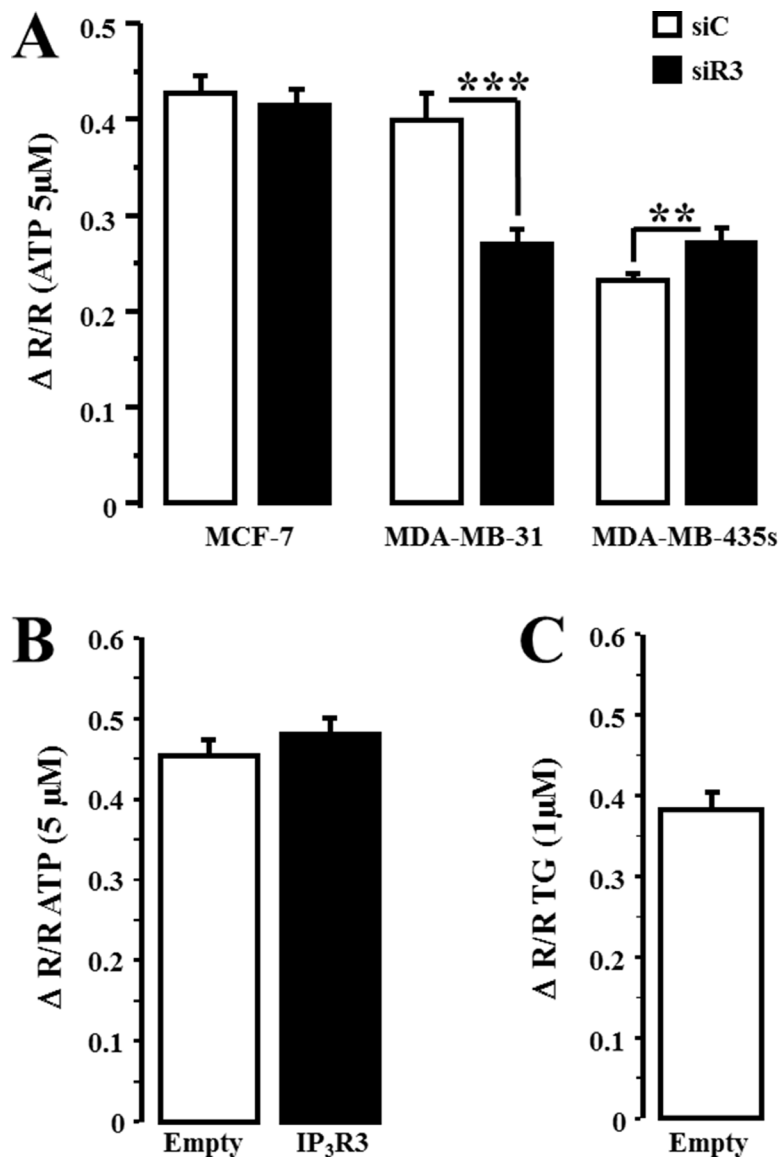

**Supplementary Figure 4: Impact of IP<sub>3</sub>R3 modulation on ATP- or thapsigargin (TG)-induced Ca<sup>2+</sup> response.** (A) silencing IP<sub>3</sub>R3 (black column) significantly decreases amplitude of the ATP-induced Ca<sup>2+</sup> response in MDA-MB-231 cells vs siC cells (white column), whereas it is significantly increased in MDA-MB-435S cells. Conversely, overexpression of IP<sub>3</sub>R3 in MCF-7 cells neither affects the amplitude of the calcium response induced by ATP- (B) nor TG (C). Values are reported as mean ± SEM (*n* = 32 to 447 cells). \*\**p* < 0.01, \*\*\**p* < 0.001.
